# Supplementary material for: A graphene/poly(vinyl alcohol) hybrid membrane self-assembled at the liquid/air interface: enhanced mechanical performance and promising saturable absorber
Source: Royal Society of Chemistry journal article supplement (doi:10.1039/c2jm32326e), 2012-01-01
Supplement: c2jm32326e.pdf [file c2jm32326e.pdf]

## Supplementary Information

# Assembling Graphene/Poly(vinyl alcohol) Hybrid Membrane at Liquid/Air Interface

Si-Da Wu,<sup>a</sup> Wei Lv,<sup>a,b</sup> Jia Xu,<sup>c</sup> Dan Han,<sup>a</sup> Xu Chen,<sup>a</sup> Pu Wang<sup>\*c</sup> and Quan-Hong Yang<sup>\*a,b</sup>

<sup>a</sup> School of Chemical Engineering and Technology, Tianjin University, Tianjin 300072, China .

<sup>b</sup> Key Laboratory of Thermal Management Engineering and Materials, Shenzhen and Advanced Materials Institute, Graduate School at Shenzhen, Tsinghua University, Shenzhen 518055, China.

<sup>c</sup> Institute of Laser Engineering, Beijing University of Technology, Beijing 100124, China.

### 1. Optical images of GNS/PVA suspension

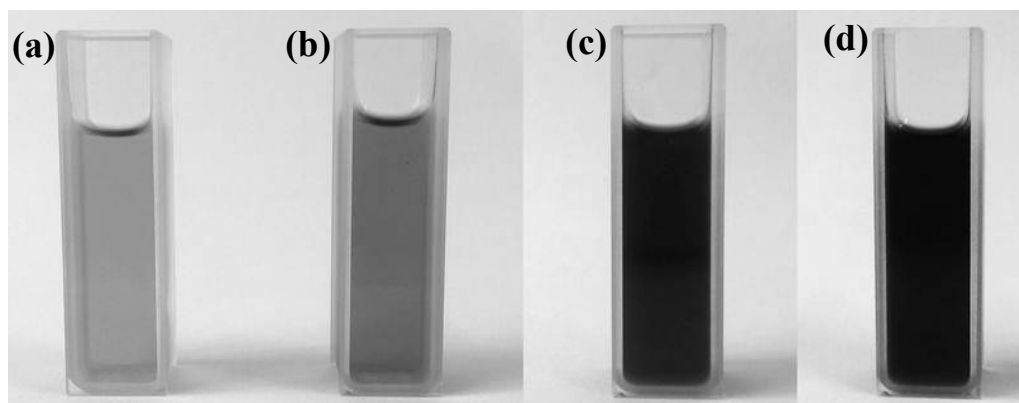

**Figure S1** Optical images of GNS/PVA suspension with the GNS fractions of 0.5 wt% (a), 0.7 wt% (b), 6 wt% (c) and 20 wt % (d) .The above suspensions are stable and no deposits can be observed in couple of weeks.

## 2. UV-Vis-NIR spectra of GNS/PVA membranes with different GNS fractions

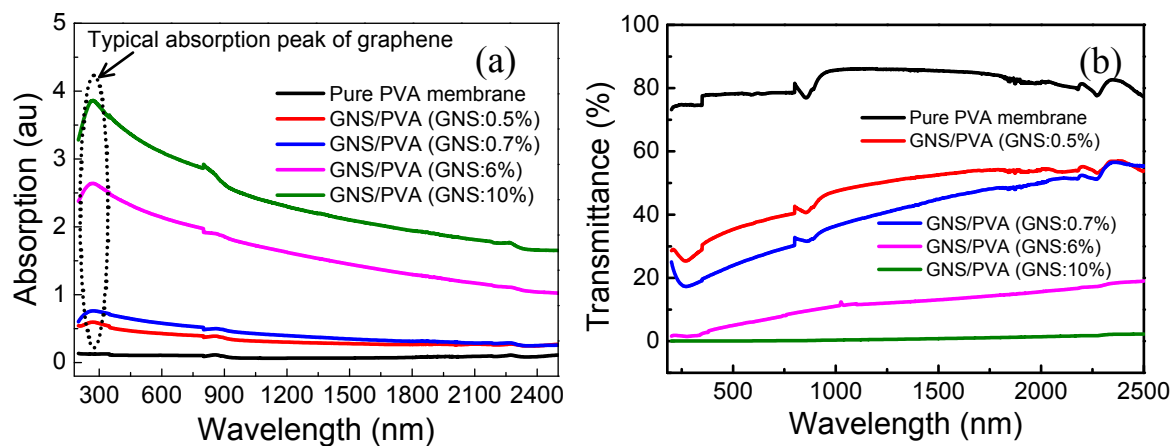

**Figure S2** The absorption and transmittance spectra of PVA membrane and GNS/PVA hybrid membranes with different GNS fractions in the range of UV-Vis-NIR range. A typical absorption peak of graphene can be observed at the wavelength of  $\sim 265 \text{ nm}^{[1]}$ , indicating the GNSs are well dispersed in the hybrid membranes.

## 3. Wettability tests

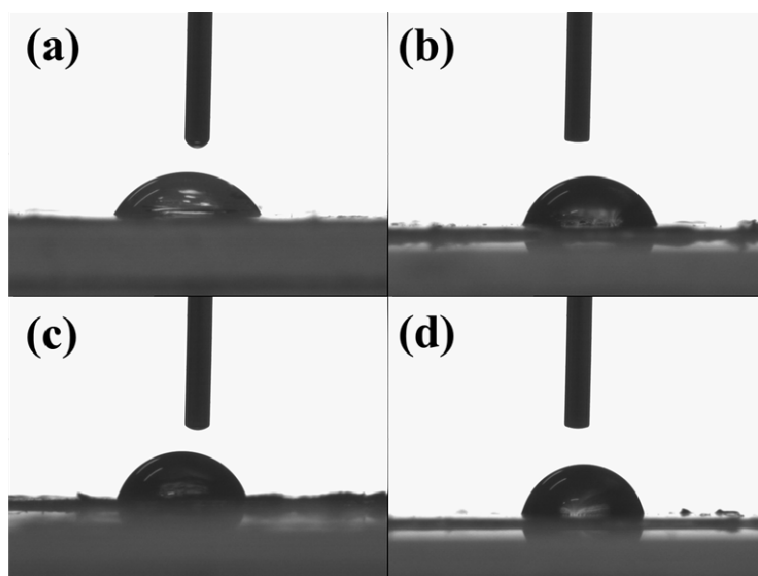

**Figure S3** Contact angles of PVA membrane (a) and GNS/PVA hybrid membranes (b-d) with the GNS fractions of 2, 6 and 20 wt% respectively. The contact angles of these membranes (a-d) are  $43^\circ$ ,  $69^\circ$ ,  $70^\circ$  and  $72^\circ$  respectively.

#### 4. Differential scanning calorimetry (DSC) measurements

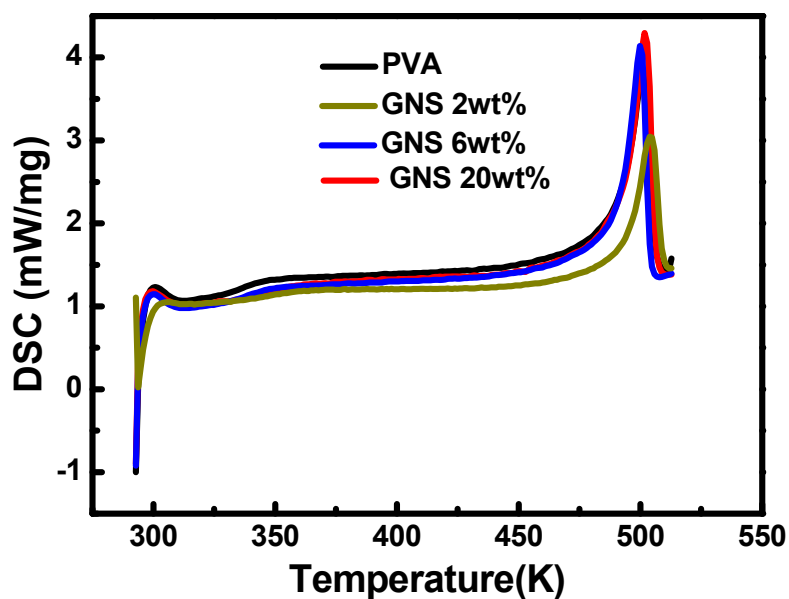

**Figure S4** DSC profiles of PVA membrane and GNS/PVA hybrid membranes with different GNS fractions.

#### References:

- [1] Kravets VG, Grigorenko AN, Nair RR, Blake P, Anissimova S, Novoselov KS, et al. Spectroscopic ellipsometry of graphene and an exciton-shifted van Hove peak in absorption. *Phys Rev B* 2010; 81:155413.
